# Supplementary material for: Lamellipodin-RICTOR Signaling Mediates Glioblastoma Cell Invasion and Radiosensitivity Downstream of EGFR
Source: MDPI journal article supplement (doi:10.3390/cancers13215337), 2021-10-24
Supplement: s1 [file s1]

# Supplementary Materials: Lamellipodin-RICTOR signaling mediates glioblastoma cell invasion and radiosensitivity downstream of EGFR

Stefanie Moritz <sup>1</sup>, Matthias Krause <sup>2</sup>, Jessica Schlatter <sup>2</sup>, Nils Cordes <sup>1,3,4,5</sup>, Anne Vehlow <sup>1,5,6,\*</sup>

<sup>1</sup> OncoRay – National Center for Radiation Research in Oncology, Faculty of Medicine, Technische Universität Dresden, Fetscherstr. 74, PF 41, 01307 Dresden, Germany; Stefanie.Moritz@uniklinikum-dresden.de (S.M.); Nils.Cordes@OncoRay.de (N.C.)

<sup>2</sup> Randall Centre of Cell and Molecular Biophysics, New Hunt's House, Guy's Campus, King's College London, London, SE1 1UL, UK; matthias.krause@kcl.ac.uk (M.K.); jessica.schlatter@kcl.ac.uk (J.S.)

<sup>3</sup> Institute of Radiooncology – OncoRay, Helmholtz-Zentrum Dresden – Rossendorf, Dresden, Germany, Bautzner Landstr. 400, 01328 Dresden, Germany

<sup>4</sup> Department of Radiotherapy and Radiation Oncology, University Hospital Carl Gustav Carus, Technische Universität Dresden, Dresden, Germany, Fetscherstr. 74, PF 50, 01307 Dresden, Germany

<sup>5</sup> German Cancer Consortium (DKTK), Partner Site Dresden, and German Cancer Research Center (DKFZ), Heidelberg, Germany, Im Neuenheimer Feld 280, 69192 Heidelberg, Germany

<sup>6</sup> National Center for Tumor Diseases (NCT), Partner Site Dresden, Germany: German Cancer Research Center (DKFZ), Heidelberg, Germany, Im Neuenheimer Feld 280, 69192 Heidelberg, Germany

\* Correspondence: Anne.Vehlow@OncoRay.de; Tel.: +49 (0)351–458–7403; Fax: +49 (0)351–458–7311 (A.V.)

## Supplementary Figures

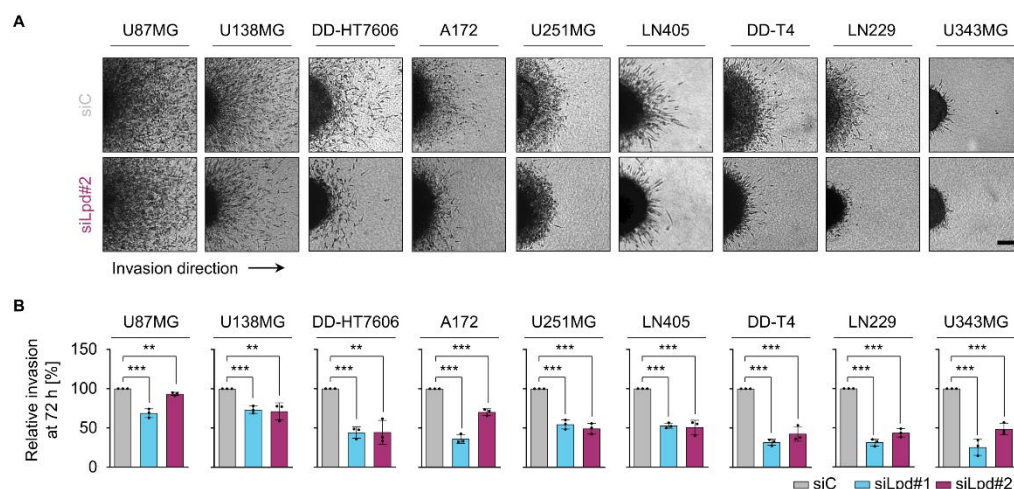

**Figure S1.** Lamellipodin promotes glioblastoma invasiveness. **(A)** Representative phase contrast images of indicated glioblastoma spheroids invading in 3D type I collagen type matrix upon Lpd or control knockdown (t = 72 h). Scale bar: 200  $\mu$ m. **(B)** Relative invasion distance of indicated glioblastoma cell lines upon control and Lpd-specific siRNA knockdown in 3D type I collagen recorded after 72 h. siRNA, small interfering RNA; C, control; Lpd, Lamellipodin.

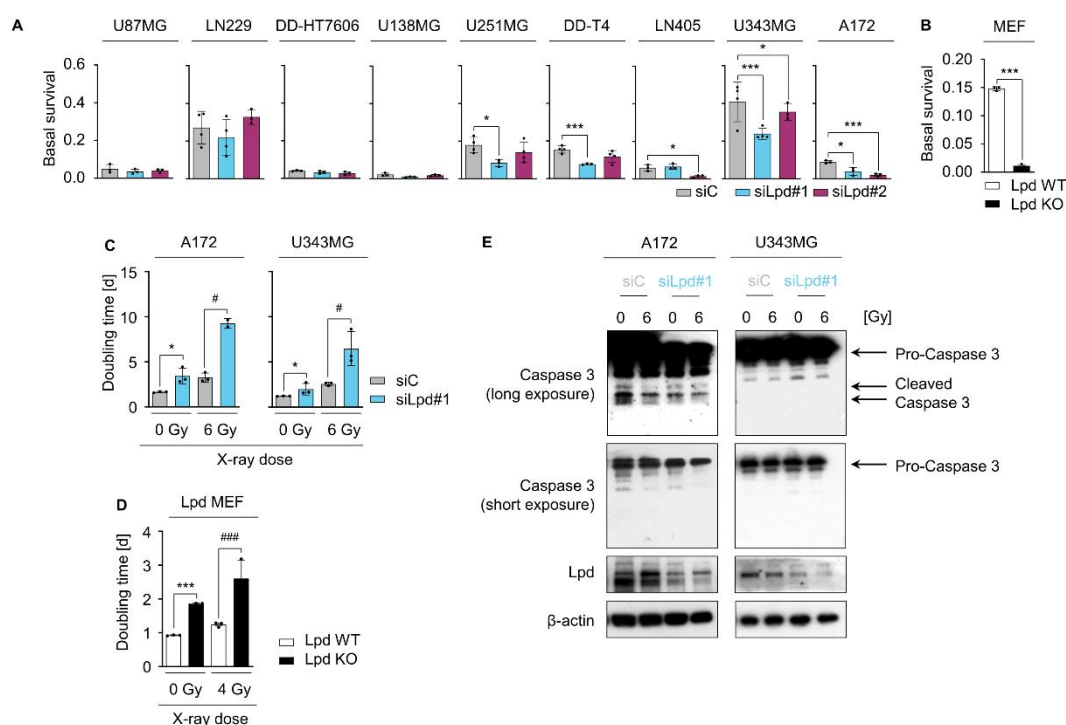

**Figure S2.** Lamellipodin promotes radiation survival and proliferation in glioblastoma cells. **(A)** Basal survival of Lpd and control depleted, unirradiated glioblastoma cells as well as **(B)** Lpd WT MEF and Lpd KO MEF. **(C)** Doubling time of A172 and U343MG cells after siRNA-mediated knockdown of Lpd and control after 6 Gy irradiation and **(D)** in Lpd WT MEF and Lpd KO MEF upon 4 Gy irradiation. Doubling time was calculated by comparing cell counts of day 3-5 to day 0. All results are presented as mean  $\pm$  SD (n = 3-4, two-sided Student's t-test, \*p < 0.05, \*\*p < 0.01, \*\*\*p < 0.001). **(E)** Representative Western blot of Caspase 3, Lpd and  $\beta$ -actin of control and Lpd silenced A172 and U343MG (n = 3) 24 h after irradiation. siRNA, small interfering RNA; C, control; Lpd, Lamellipodin; MEF, mouse embryonic fibroblasts; WT, wild type; KO, knockout.

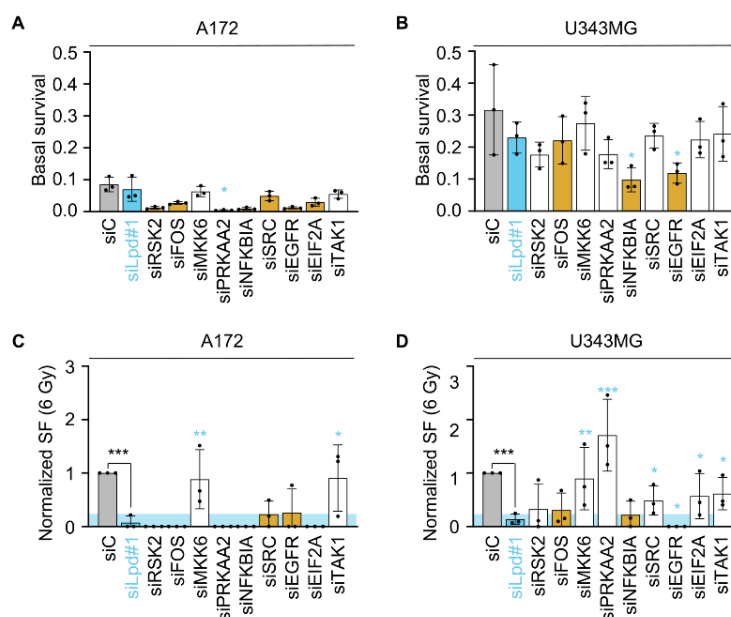

**Figure S3.** Lamellipodin and EGFR-MAPK signaling proteins co-regulate glioblastoma radiosensitivity. (A) Basal survival (0 Gy) upon siRNA mediated knockdown of Lpd and the identified proteins in A172 and (B) U343MG. (C) Normalized clonogenic radiation survival (6 Gy) of A172 cells and (D) U343MG cells upon siRNA mediated knockdown of Lpd and the identified proteins. Yellow columns indicate a surviving fraction comparable to single Lpd knockdown, whereas white columns indicate a differing survival. The blue area represents the normalized surviving fraction after Lpd knockdown and 6 Gy irradiation. Results present mean  $\pm$  SD ( $n = 3$ , two-sided Student's  $t$ -test, n.s., not significant, siLpd / siC \*\*\* $p < 0.001$ , siRNA / siLpd \* $p < 0.05$ , \*\* $p < 0.01$ , \*\*\* $p < 0.001$ ). siRNA, small interfering RNA; C, control; Lpd, Lamellipodin; SF, surviving fraction.

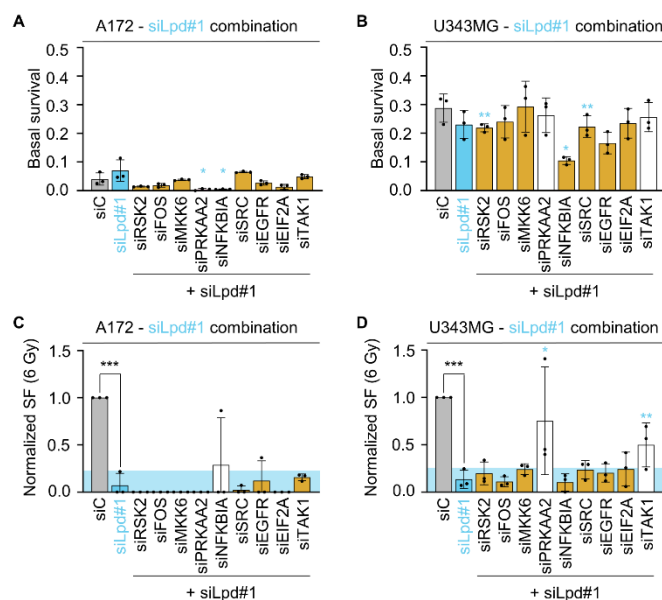

**Figure S4.** Lamellipodin and EGFR-MAPK signaling proteins co-regulate glioblastoma radiosensitivity. (A) Normalized clonogenic radiation survival (6 Gy) of A172 cells and (B) U343MG cells upon siRNA mediated knockdown of Lpd combined with the indicated proteins. (C) Normalized clonogenic radiation survival at 6 Gy of A172 and (D) U343MG cells upon siRNA-specific double knockdown of Lpd and indicated proteins. Yellow columns indicate a surviving fraction comparable to single Lpd knockdown, whereas white columns indicate a differing survival. The blue area shows the normalized surviving fraction upon Lpd silencing and 6 Gy X-ray exposure. Results present mean

$\pm$  SD (n = 3, two-sided Student's t-test, siLpd / siC \*\*\*p < 0.001, siRNA / siLpd \*p < 0.05, \*\*p < 0.01). siRNA, small interfering RNA; C, control; Lpd, Lamellipodin; SF, surviving fraction.

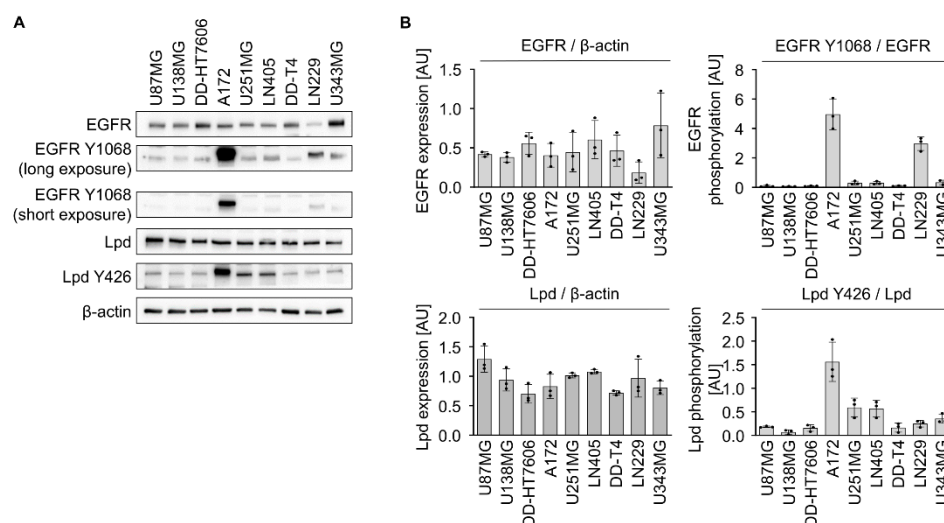

**Figure S5** EGFR and Lpd expression and phosphorylation status in glioblastoma cells. **(A)** Representative Western blot of EGFR and Lpd expression and phosphorylation in whole cell lysates of indicated glioblastoma cell lines.  $\beta$ -actin served as loading control. **(B)** Densitometric analysis of EGFR and Lpd expression and EGFR Y1068 (short exposure) and Lpd Y426 phosphorylation from (A). Expression of EGFR and Lpd was normalized to  $\beta$ -actin. EGFR and Lpd phosphorylation were calculated by normalization to EGFR or Lpd expression. Results represent mean  $\pm$  SD (n = 3).

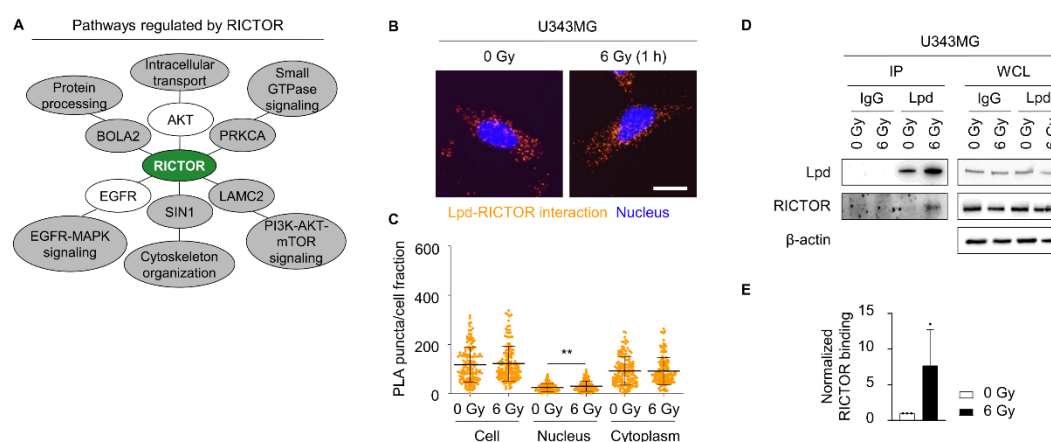

**Figure S6.** Lamellipodin and RICTOR interact. **(A)** Pathways regulated by RICTOR with connecting proteins identified by Lpd immunoprecipitation and mass spectrometry (grey) and published interaction partners of RICTOR (white). **(B)** Interaction of Lpd and RICTOR detected with proximity ligation assay in unirradiated and 6 Gy irradiated U343MG cells. Scale bar: 20  $\mu$ m. **(C)** Quantification of puncta from (B) in whole cell, nucleus and cytoplasm using Fiji. Results present mean  $\pm$  SD (n = 3, two-sided Student's t-test, n.s., not significant, \*p < 0.05, \*\*p < 0.01, \*\*\*p < 0.001). **(D)** Western blot showing expression of Lpd and RICTOR in immunoprecipitates and whole cell lysates 1 h after 0 Gy or 6 Gy irradiation from U343MG cells. **(E)** Densitometric analyses presenting relative RICTOR binding from (E). Fold changes are calculated by normalization to Lpd and 0 Gy according to representative Western blot. Data are shown as mean  $\pm$  SD (n = 3). PLA, proximity ligation assay; IP, immunoprecipitation; WCL, whole cell lysates; IgG, immunoglobulin G; Lpd, Lamellipodin.

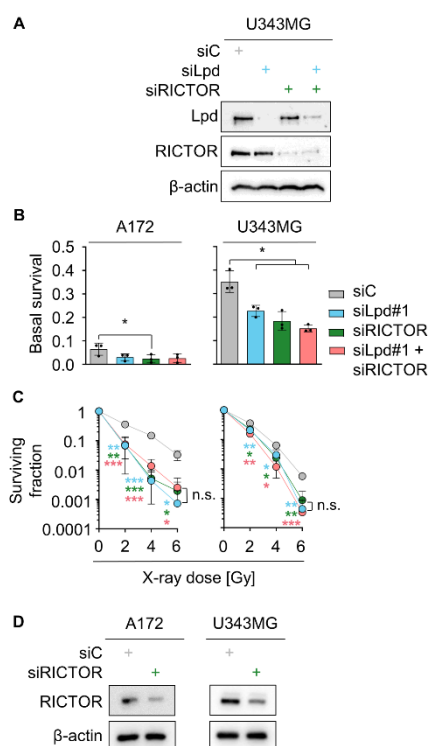

**Figure S7.** Lamellipodin and RICTOR co-control glioblastoma radiosensitivity and invasion. **(A)** Western blot of knockdown efficiency of control, Lpd and RICTOR specific siRNA in whole cell lysates of U343MG. **(B)** Basal survival (0 Gy) and **(C)** clonogenic radiation survival of A172 and U343MG upon Lpd- and RICTOR-specific siRNA knockdown. **(D)** Western Blot analysis of A172 and U343MG cells upon control and RICTOR knockdown. Results are mean  $\pm$  SD ( $n = 3$ , two-sided Student's  $t$ -test, n.s., not significant, \* $p < 0.05$ , \*\* $p < 0.01$ , \*\*\* $p < 0.001$ ). siRNA, small interfering RNA; C, control; Lpd, Lamellipodin.

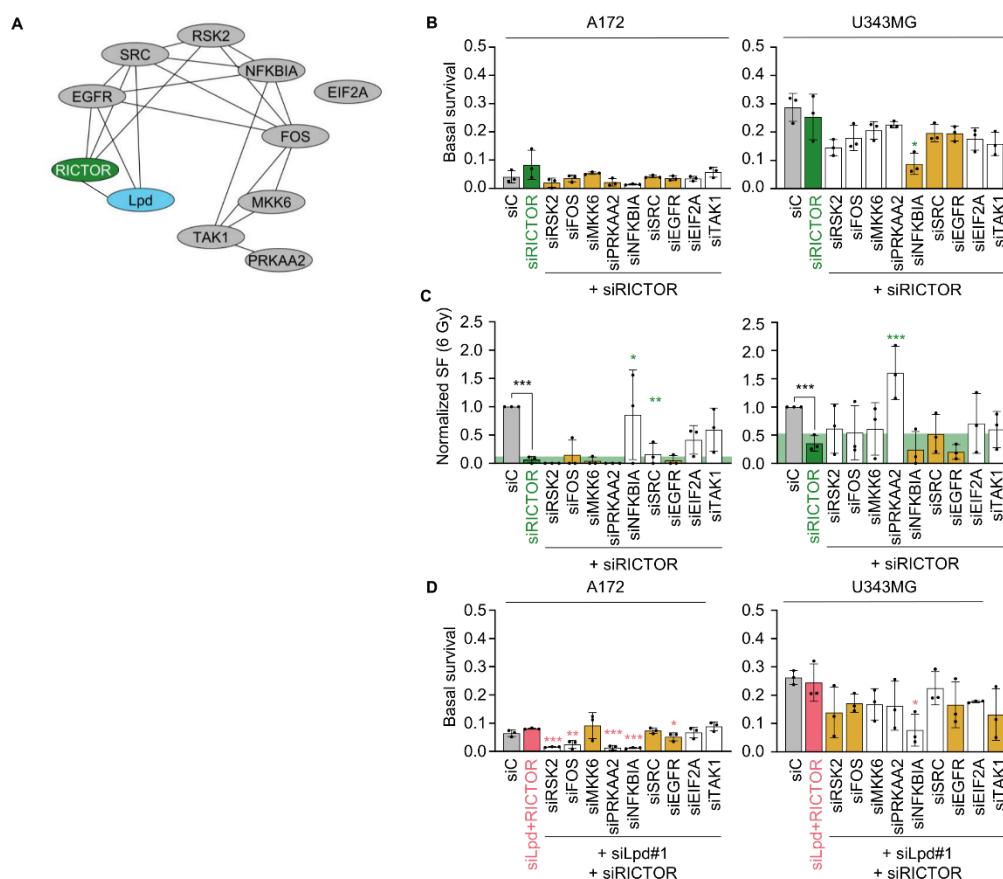

**Figure S8.** Lamellipodin and RICTOR jointly regulate radiosensitivity via EGFR. **(A)** Interactome of Lpd and RICTOR with the nine previous identified proteins EIF2A, EGFR, FOS, MKK6, NFKB1A, PRKAA2, RSK2, SRC and TAK1 using Cytoscape. **(B)** Basal survival (0 Gy) upon siRNA-specific double knockdown of RICTOR and the indicated proteins in A172 and U343MG cells. **(C)** Normalized surviving fraction at 6 Gy of A172 and U343MG among silencing of RICTOR and the indicated proteins. Basal survival (0 Gy) upon siRNA-specific triple knockdown of Lpd, RICTOR and indicated proteins in A172 and U343MG cells. Yellow columns indicate a surviving fraction comparable to single Lpd knockdown, whereas white columns indicate a differing survival compared to siRICKTOR (B,C) and siLpd + siRICKTOR (D). The green area in (C) represent the normalized surviving fraction upon siRICKTOR and 6 Gy irradiation. Results show mean  $\pm$  SD ( $n = 3$ , two-sided Student's t-test, siRICKTOR / siC  $***p < 0.001$ , siRNA / siRICKTOR  $*p < 0.05$ ,  $**p < 0.01$ ,  $***p < 0.001$ , siRNA / siLpd + siRICKTOR  $*p < 0.05$ ,  $**p < 0.01$ ,  $***p < 0.001$ ). siRNA, small interfering RNA; C, control; Lpd, Lamellipodin; SF, surviving fraction

## Supplementary Tables

**Table S1.** Synergistic and additive effects of siLpd knockdown and 6 Gy X-ray irradiation. Synergistic and additive effects were calculated as published [1] using following formula:  $S = r(a, b) - r(a0, b) \times r(a, b0)$ . a = siLpd; b = X-rays. Additive effects are shown in blue. Related to Figure 2.

| Cell line | knockdown | r(a,b) | r(a0,b) | r(a,b0) | S      |
|-----------|-----------|--------|---------|---------|--------|
| U87MG     | siLpd#1   | 0.0753 | 0.0065  | 0.0493  | 0.0750 |
|           | siLpd#2   | 0.0954 | 0.0065  | 0.0392  | 0.0952 |
| LN229     | siLpd#1   | 0.0308 | 0.0190  | 0.1824  | 0.0273 |
|           | siLpd#2   | 0.0034 | 0.0190  | 0.1178  | 0.0012 |
| DD-HT7606 | siLpd#1   | 0.0904 | 0.0065  | 0.0328  | 0.0902 |
|           | siLpd#2   | 0.0784 | 0.0061  | 0.0294  | 0.0783 |
| U138MG    | siLpd#1   | 0.0170 | 0.0015  | 0.0071  | 0.0170 |
|           | siLpd#2   | 0.0795 | 0.0015  | 0.0182  | 0.0795 |
| U251MG    | siLpd#1   | 0.0485 | 0.0236  | 0.0834  | 0.0465 |
|           | siLpd#2   | 0.0972 | 0.0244  | 0.0883  | 0.0950 |
| DD-T4     | siLpd#1   | 0.0162 | 0.0162  | 0.0769  | 0.0150 |
|           | siLpd#2   | 0.0856 | 0.0213  | 0.1460  | 0.0825 |
| LN405     | siLpd#1   | 0.0290 | 0.0593  | 0.0658  | 0.0251 |
|           | siLpd#2   | 0.0023 | 0.0593  | 0.0144  | 0.0015 |
| U343MG    | siLpd#1   | 0.0052 | 0.0099  | 0.2383  | 0.0028 |
|           | siLpd#2   | 0.0049 | 0.0139  | 0.3550  | 0.0000 |
| A172      | siLpd#1   | 0.0008 | 0.0066  | 0.0567  | 0.0005 |
|           | siLpd#2   | 0.0017 | 0.0066  | 0.0205  | 0.0015 |

**Table S2.** Mean intensity of indicated phosphorylation sites at 0 Gy and 6 Gy upon siC and siLpd#1 treatment. Data are presented as mean  $\pm$  SD. Related to Figure 3.

| <b>Protein<br/>(Phosphosite)</b>     | <b>siC</b>  |           | <b>siC</b>  |           | <b>siLpd#1</b> |           | <b>siLpd#1</b> |           |
|--------------------------------------|-------------|-----------|-------------|-----------|----------------|-----------|----------------|-----------|
|                                      | <b>0 Gy</b> | <b>SD</b> | <b>6 Gy</b> | <b>SD</b> | <b>0 Gy</b>    | <b>SD</b> | <b>6 Gy</b>    | <b>SD</b> |
| AKT (S473)                           | 0.19        | 0.05      | 0.16        | 0.05      | 0.16           | 0.03      | 0.16           | 0.08      |
| PRKAA2<br>(T172)                     | 0.13        | 0.02      | 0.08        | 0.02      | 0.08           | 0.01      | 0.08           | 0.02      |
| BAD (S112)                           | 0.13        | 0.03      | 0.11        | 0.03      | 0.10           | 0.03      | 0.10           | 0.03      |
| EIF4EBP1<br>(T36)                    | 0.20        | 0.03      | 0.20        | 0.03      | 0.18           | 0.05      | 0.19           | 0.05      |
| GSK3A (S21)                          | 0.05        | 0.00      | 0.05        | 0.00      | 0.04           | 0.01      | 0.04           | 0.01      |
| GSK3B (S9)                           | 0.34        | 0.07      | 0.31        | 0.07      | 0.27           | 0.05      | 0.25           | 0.08      |
| mTOR (S2448)                         | 0.14        | 0.04      | 0.12        | 0.04      | 0.12           | 0.04      | 0.13           | 0.05      |
| CDKN1B<br>(T198)                     | 0.05        | 0.03      | 0.07        | 0.03      | 0.05           | 0.02      | 0.05           | 0.02      |
| P70S6K<br>(T421/S424)                | 0.16        | 0.02      | 0.15        | 0.02      | 0.15           | 0.03      | 0.16           | 0.04      |
| PDK1 (S241)                          | 0.12        | 0.01      | 0.11        | 0.01      | 0.12           | 0.03      | 0.12           | 0.04      |
| PRAS40<br>(T246)                     | 0.08        | 0.02      | 0.09        | 0.02      | 0.06           | 0.02      | 0.07           | 0.03      |
| PTEN (S380)                          | 0.13        | 0.05      | 0.11        | 0.05      | 0.10           | 0.01      | 0.11           | 0.02      |
| RAF1 (S301)                          | 0.07        | 0.03      | 0.06        | 0.03      | 0.05           | 0.01      | 0.05           | 0.03      |
| RPS6<br>(S235/236)                   | 0.19        | 0.08      | 0.16        | 0.08      | 0.15           | 0.06      | 0.16           | 0.07      |
| EGFR<br>(Ser1070)                    | 0.16        | 0.07      | 0.15        | 0.07      | 0.19           | 0.12      | 0.13           | 0.09      |
| JAK1<br>(Tyr1022)                    | 0.07        | 0.02      | 0.05        | 0.02      | 0.06           | 0.01      | 0.06           | 0.01      |
| JAK2<br>(Tyr1007/1008)               | 0.07        | 0.02      | 0.06        | 0.02      | 0.07           | 0.01      | 0.06           | 0.02      |
| SHP1 (Ser591)                        | 0.02        | 0.00      | 0.02        | 0.00      | 0.02           | 0.00      | 0.01           | 0.01      |
| SHP2 (Tyr542)                        | 0.12        | 0.03      | 0.12        | 0.03      | 0.11           | 0.01      | 0.09           | 0.01      |
| Src (Tyr419)                         | 0.06        | 0.01      | 0.07        | 0.01      | 0.06           | 0.01      | 0.05           | 0.01      |
| Stat1 (Ser727)                       | 0.02        | 0.01      | 0.02        | 0.01      | 0.03           | 0.00      | 0.03           | 0.00      |
| Stat2 (Tyr689)                       | 0.06        | 0.01      | 0.06        | 0.01      | 0.06           | 0.01      | 0.06           | 0.00      |
| Stat3 (Tyr705)                       | 0.04        | 0.01      | 0.04        | 0.01      | 0.05           | 0.01      | 0.04           | 0.00      |
| Stat5 (Tyr694)                       | 0.01        | 0.00      | 0.02        | 0.00      | 0.02           | 0.00      | 0.02           | 0.00      |
| Stat6 (Tyr641)                       | 0.01        | 0.00      | 0.01        | 0.00      | 0.01           | 0.00      | 0.01           | 0.00      |
| TYK2<br>(Tyr1054)                    | 0.06        | 0.01      | 0.07        | 0.01      | 0.05           | 0.01      | 0.06           | 0.01      |
| CREB (S133)                          | 0.13        | 0.03      | 0.12        | 0.03      | 0.08           | 0.03      | 0.05           | 0.01      |
| ERK1/2<br>(T202/Y204)<br>(Y185/Y187) | 0.07        | 0.01      | 0.08        | 0.01      | 0.07           | 0.01      | 0.06           | 0.02      |
| HSP27 (S82)                          | 0.06        | 0.02      | 0.06        | 0.02      | 0.05           | 0.02      | 0.04           | 0.01      |
| JNK (T183)                           | 0.18        | 0.05      | 0.15        | 0.05      | 0.11           | 0.07      | 0.09           | 0.04      |
| MEK<br>(S217/221)                    | 0.04        | 0.02      | 0.03        | 0.02      | 0.03           | 0.01      | 0.02           | 0.00      |
| MKK3 (S189)                          | 0.12        | 0.02      | 0.11        | 0.02      | 0.08           | 0.05      | 0.06           | 0.02      |
| MMK6 (S207)                          | 0.04        | 0.01      | 0.04        | 0.01      | 0.02           | 0.02      | 0.02           | 0.01      |
| MSK2 (S360)                          | 0.03        | 0.01      | 0.03        | 0.01      | 0.03           | 0.00      | 0.02           | 0.00      |



|                         |      |      |      |      |      |      |      |      |
|-------------------------|------|------|------|------|------|------|------|------|
| MAPK14<br>(T180/Y182)   | 0.10 | 0.02 | 0.10 | 0.02 | 0.10 | 0.02 | 0.10 | 0.01 |
| TP53 (S15)              | 0.23 | 0.05 | 0.19 | 0.05 | 0.16 | 0.10 | 0.14 | 0.05 |
| RSK1 (S380)             | 0.05 | 0.02 | 0.06 | 0.02 | 0.03 | 0.02 | 0.03 | 0.01 |
| RSK2 (S386)             | 0.04 | 0.02 | 0.04 | 0.02 | 0.02 | 0.01 | 0.02 | 0.01 |
| ATM (S1981)             | 0.25 | 0.01 | 0.25 | 0.01 | 0.25 | 0.06 | 0.21 | 0.05 |
| EIF2A (S51)             | 0.04 | 0.01 | 0.04 | 0.01 | 0.04 | 0.01 | 0.03 | 0.01 |
| HDAC2 (S394)            | 0.18 | 0.01 | 0.19 | 0.01 | 0.18 | 0.05 | 0.17 | 0.03 |
| HDAC4 (S632)            | 0.11 | 0.02 | 0.13 | 0.02 | 0.10 | 0.01 | 0.11 | 0.04 |
| NFKB1 (S32)             | 0.04 | 0.01 | 0.03 | 0.01 | 0.03 | 0.01 | 0.04 | 0.01 |
| MSK1 (S376)             | 0.05 | 0.01 | 0.05 | 0.01 | 0.04 | 0.01 | 0.05 | 0.01 |
| NFKBIA<br>(S536)        | 0.09 | 0.01 | 0.10 | 0.01 | 0.09 | 0.01 | 0.09 | 0.01 |
| TAK1 (S412)             | 0.02 | 0.01 | 0.04 | 0.01 | 0.03 | 0.02 | 0.02 | 0.01 |
| TBK1 (S172)             | 0.83 | 0.04 | 0.89 | 0.04 | 0.88 | 0.03 | 0.81 | 0.10 |
| ZAP70 (Y292)            | 0.06 | 0.01 | 0.09 | 0.01 | 0.07 | 0.02 | 0.08 | 0.01 |
| ATF2 (T69/71)           | 0.05 | 0.02 | 0.05 | 0.02 | 0.04 | 0.01 | 0.05 | 0.01 |
| FOS (T232)              | 0.02 | 0.01 | 0.02 | 0.01 | 0.01 | 0.00 | 0.02 | 0.00 |
| JUN (S73)               | 0.09 | 0.01 | 0.07 | 0.01 | 0.08 | 0.03 | 0.07 | 0.01 |
| SMAD1<br>(S463/465)     | 0.03 | 0.01 | 0.03 | 0.01 | 0.02 | 0.00 | 0.02 | 0.00 |
| SMAD2<br>(S245/250/255) | 0.03 | 0.02 | 0.03 | 0.02 | 0.04 | 0.01 | 0.03 | 0.02 |
| SMAD4 (T277)            | 0.07 | 0.02 | 0.06 | 0.02 | 0.06 | 0.01 | 0.06 | 0.01 |
| SMAD5<br>(S463/465)     | 0.05 | 0.02 | 0.05 | 0.02 | 0.05 | 0.01 | 0.05 | 0.00 |

**Table S3.** Fold change normalized to 0 Gy of indicated phosphorylation sites calculated from mean intensity from Table S1. Data are presented as mean  $\pm$  SD. Related to Figure 3.

| Protein (Phosphosite)             | siC 6 Gy |      | siLpd#1        |      |
|-----------------------------------|----------|------|----------------|------|
|                                   | / 0 Gy   | SD   | 6 Gy /<br>0 Gy | SD   |
| AKT (S473)                        | 0.90     | 0.50 | 0.93           | 0.38 |
| PRKAA (T172)                      | 0.60     | 0.11 | 1.00           | 0.39 |
| BAD (S112)                        | 0.86     | 0.12 | 0.98           | 0.10 |
| EIF4EBP1 (T36)                    | 0.98     | 0.11 | 1.02           | 0.09 |
| GSK3A (S21)                       | 1.09     | 0.44 | 1.17           | 0.16 |
| GSK3B (S9)                        | 0.89     | 0.23 | 0.91           | 0.17 |
| mTOR (S2448)                      | 0.87     | 0.10 | 1.04           | 0.16 |
| CDKN1B (T198)                     | 2.64     | 3.47 | 0.93           | 0.24 |
| P70S6K (T421/S424)                | 0.94     | 0.14 | 1.10           | 0.19 |
| PDK1 (S241)                       | 0.93     | 0.26 | 1.05           | 0.11 |
| PRAS40 (T246)                     | 1.30     | 0.41 | 1.25           | 0.23 |
| PTEN (S380)                       | 0.93     | 0.13 | 1.08           | 0.18 |
| RAF1 (S301)                       | 0.88     | 0.40 | 0.90           | 0.29 |
| RPS6 (S235/236)                   | 0.84     | 0.12 | 1.02           | 0.12 |
| EGFR (Ser1070)                    | 0.98     | 0.19 | 0.64           | 0.12 |
| JAK1 (Tyr1022)                    | 0.87     | 0.28 | 1.04           | 0.38 |
| JAK2 (Tyr1007/1008)               | 0.81     | 0.08 | 0.90           | 0.33 |
| SHP1 (Ser591)                     | 0.85     | 0.16 | 0.84           | 0.32 |
| SHP2 (Tyr542)                     | 1.09     | 0.59 | 0.85           | 0.09 |
| Src (Tyr419)                      | 1.39     | 0.23 | 0.93           | 0.11 |
| Stat1 (Ser727)                    | 1.18     | 0.90 | 0.98           | 0.08 |
| Stat2 (Tyr689)                    | 1.04     | 0.31 | 1.05           | 0.15 |
| Stat3 (Tyr705)                    | 1.00     | 0.14 | 0.98           | 0.16 |
| Stat5 (Tyr694)                    | 1.15     | 0.51 | 1.13           | 0.17 |
| Stat6 (Tyr641)                    | 1.61     | 1.08 | 1.13           | 0.27 |
| TYK2 (Tyr1054)                    | 1.17     | 0.42 | 1.39           | 0.51 |
| CREB (S133)                       | 0.99     | 0.23 | 0.76           | 0.15 |
| ERK1/2 (T202/Y204)<br>(Y185/Y187) | 1.05     | 0.21 | 0.80           | 0.20 |
| HSP27 (S82)                       | 1.07     | 0.25 | 0.99           | 0.38 |
| JNK (T183)                        | 0.85     | 0.11 | 0.94           | 0.43 |
| MEK (S217/221)                    | 1.04     | 0.34 | 1.07           | 0.35 |
| MKK3 (S189)                       | 0.99     | 0.15 | 0.96           | 0.28 |
| MMK6 (S207)                       | 0.94     | 0.13 | 2.11           | 1.98 |
| MSK2 (S360)                       | 0.98     | 0.44 | 0.91           | 0.37 |
| MAPK14 (T180/Y182)                | 1.01     | 0.11 | 1.01           | 0.08 |
| TP53 (S15)                        | 0.84     | 0.21 | 1.06           | 0.43 |
| RSK1 (S380)                       | 1.10     | 0.18 | 1.04           | 0.39 |
| RSK2 (S386)                       | 0.83     | 0.38 | 1.87           | 1.45 |
| ATM (S1981)                       | 1.01     | 0.13 | 0.86           | 0.24 |
| EIF2A (S51)                       | 1.00     | 0.08 | 0.65           | 0.13 |
| HDAC2 (S394)                      | 1.05     | 0.14 | 1.07           | 0.55 |
| HDAC4 (S632)                      | 1.14     | 0.11 | 1.06           | 0.36 |
| NFKB1 (S32)                       | 0.78     | 0.22 | 1.21           | 0.22 |
| MSK1 (S376)                       | 0.99     | 0.22 | 1.04           | 0.23 |
| NFKBIA (S536)                     | 1.12     | 0.07 | 1.00           | 0.14 |
| TAK1 (S412)                       | 3.44     | 3.61 | 0.89           | 0.20 |

|                         |      |      |      |      |
|-------------------------|------|------|------|------|
| TBK1 (S172)             | 1.07 | 0.07 | 0.92 | 0.10 |
| ZAP70 (Y292)            | 1.65 | 0.52 | 1.38 | 0.76 |
| ATF2 (T69/71)           | 1.02 | 0.14 | 1.22 | 0.27 |
| FOS (T232)              | 0.96 | 0.28 | 2.05 | 0.55 |
| JUN (S73)               | 0.81 | 0.13 | 0.95 | 0.31 |
| SMAD1 (S463/465)        | 1.07 | 0.13 | 1.03 | 0.24 |
| SMAD2<br>(S245/250/255) | 1.60 | 0.92 | 0.71 | 0.29 |
| SMAD4 (T277)            | 1.10 | 0.46 | 0.97 | 0.25 |
| SMAD5 (S463/465)        | 1.17 | 0.45 | 1.02 | 0.21 |

**Table S4.** Lamellipodin bound proteins detected by mass spectrometry following Lamellipodin immunoprecipitation from unirradiated cells (IgG as non-specific control). Related to Figure 5.

| <b>Protein</b> | <b>Ratio of mean<br/>Log2 LFQ intensity<br/>(Lpd / IgG)</b> | <b>Ratio of mean<br/>peptides (IgG /<br/>Lpd)</b> |
|----------------|-------------------------------------------------------------|---------------------------------------------------|
| ADD3           | 12.6                                                        | 2.0                                               |
| ADGRG1;GPR56   | 12.1                                                        | 3.0                                               |
| ARPC1A         | 13.0                                                        | 2.0                                               |
| BCL7C          | 13.7                                                        | 2.0                                               |
| BOLA2;BOLA2B   | 12.4                                                        | 3.0                                               |
| CEP85          | 25.9                                                        | 4.3                                               |
| CLPTM1L        | 12.6                                                        | 2.0                                               |
| COG3           | 12.4                                                        | 2.0                                               |
| COL1A1         | 12.6                                                        | 2.0                                               |
| COX4I1         | 12.7                                                        | 3.0                                               |
| DENR           | 23.2                                                        | 4.0                                               |
| DFFA           | 12.5                                                        | 3.0                                               |
| DMBT1          | 12.6                                                        | 2.0                                               |
| ESYT2          | 12.0                                                        | 2.0                                               |
| GTF3C3         | 11.5                                                        | 2.0                                               |
| HS1BP3         | 12.3                                                        | 3.0                                               |
| LAMC2          | 12.7                                                        | 2.0                                               |
| MAPRE3         | 12.0                                                        | 2.0                                               |
| MPZL1          | 13.2                                                        | 2.0                                               |
| MTR            | 11.4                                                        | 2.0                                               |
| NUCB1          | 23.6                                                        | 2.0                                               |
| OBSL1          | 12.2                                                        | 3.0                                               |
| PRAF2          | 12.6                                                        | 2.0                                               |
| PRIM1          | 10.8                                                        | 2.0                                               |
| PTMA           | 12.4                                                        | 3.0                                               |
| R3HDM1         | 23.6                                                        | 2.0                                               |
| RAF1;ARAF      | 12.7                                                        | 2.0                                               |
| RICTOR         | 2.0                                                         | 3.5                                               |
| S100A13        | 24.3                                                        | 4.0                                               |
| SEC61A1        | 13.1                                                        | 2.0                                               |
| SIPA1L3        | 12.5                                                        | 2.5                                               |
| SNX7           | 11.7                                                        | 2.0                                               |
| SP1            | 12.8                                                        | 2.0                                               |
| TRMT1L         | 12.5                                                        | 2.0                                               |
| ZFR            | 11.7                                                        | 2.0                                               |
| ZMPSTE24       | 12.8                                                        | 3.0                                               |

**Table S5.** Lamellipodin bound proteins detected by mass spectrometry following Lamellipodin immunoprecipitation from 6-Gy irradiated cells (IgG as non-specific control). Related to Figure 5.

| <b>Protein</b>    | <b>Ratio of mean Log2<br/>LFQ intensity<br/>(Lpd / IgG)</b> | <b>Ratio of mean<br/>peptides (IgG /<br/>Lpd)</b> |
|-------------------|-------------------------------------------------------------|---------------------------------------------------|
| ABHD14B           | 23.9                                                        | 4.0                                               |
| ABLIM3            | 11.8                                                        | 2.0                                               |
| ABR;BCR           | 12.0                                                        | 2.0                                               |
| ADAR              | 24.0                                                        | 2.5                                               |
| AGO4              | 12.6                                                        | 2.0                                               |
| AKAP2             | 12.3                                                        | 2.0                                               |
| ANAPC1            | 11.0                                                        | 2.0                                               |
| ANAPC4            | 11.5                                                        | 2.0                                               |
| ANKS1A            | 11.0                                                        | 2.0                                               |
| ANXA6             | 12.9                                                        | 3.0                                               |
| APOBEC3G;APOBEC3F | 11.5                                                        | 2.0                                               |
| ARG1              | 12.7                                                        | 2.0                                               |
| ARL8B;ARL8A       | 23.6                                                        | 2.0                                               |
| ARPC1A            | 13.6                                                        | 2.0                                               |
| ATG16L1           | 11.9                                                        | 2.0                                               |
| BRE               | 11.9                                                        | 2.0                                               |
| CCDC50            | 24.8                                                        | 2.5                                               |
| CFAP36            | 11.6                                                        | 2.0                                               |
| CKB               | 12.1                                                        | 2.0                                               |
| CLTCL1            | 12.4                                                        | 2.0                                               |
| CNIH4             | 12.3                                                        | 2.0                                               |
| CNOT3             | 24.1                                                        | 2.0                                               |
| CNOT7             | 12.0                                                        | 2.0                                               |
| CNTNAP1           | 12.5                                                        | 5.0                                               |
| COL1A1            | 13.1                                                        | 2.0                                               |
| COMMD3;COMMD3-    |                                                             |                                                   |
| BMI1              | 12.0                                                        | 2.0                                               |
| CWF19L1           | 11.6                                                        | 2.0                                               |
| CYFIP2            | 11.9                                                        | 2.0                                               |
| DCD               | 10.9                                                        | 2.0                                               |
| DENND1A           | 2.0                                                         | 3.8                                               |
| DHPS              | 24.4                                                        | 2.0                                               |
| DHX32             | 10.8                                                        | 2.0                                               |
| DHX57             | 13.0                                                        | 3.5                                               |
| DICER1            | 10.7                                                        | 2.0                                               |
| DYNC1I1           | 13.2                                                        | 2.0                                               |
| DYRK1A;DYRK1B     | 12.4                                                        | 2.0                                               |
| EDC3              | 24.2                                                        | 2.3                                               |
| ELMO2;ELMO1       | 23.3                                                        | 2.0                                               |
| EPS8              | 12.1                                                        | 2.0                                               |
| FADS3             | 11.6                                                        | 2.0                                               |
| FAM65A            | 12.8                                                        | 4.0                                               |
| FAM91A1           | 12.0                                                        | 2.0                                               |
| FANCI             | 11.8                                                        | 3.0                                               |
| FKBP8             | 25.6                                                        | 3.5                                               |
| FRMD4A            | 12.4                                                        | 4.0                                               |
| FRYL              | 11.6                                                        | 2.0                                               |

---

|              |      |     |
|--------------|------|-----|
| G6PC3        | 12.2 | 2.0 |
| GALE         | 12.5 | 2.0 |
| GALNT7       | 11.2 | 2.0 |
| GEMIN4       | 12.3 | 3.0 |
| GMFB         | 11.5 | 2.0 |
| GNE          | 23.5 | 2.5 |
| GPSM2        | 12.3 | 2.0 |
| GTF2F2       | 12.2 | 2.0 |
| GTF3C1       | 12.0 | 2.0 |
| GTF3C3       | 11.7 | 3.0 |
| GTF3C4       | 12.9 | 2.0 |
| GTPBP1       | 12.1 | 2.0 |
| GYS1         | 12.1 | 2.0 |
| HEATR3       | 11.3 | 2.0 |
| HELZ         | 11.2 | 2.0 |
| HELZ2        | 24.1 | 2.0 |
| HNRNPK       | 12.3 | 2.0 |
| HSPE1-MOB4   | 12.3 | 2.0 |
| INPP5K       | 12.0 | 2.0 |
| ITPA         | 23.6 | 2.0 |
| ITSN2        | 11.8 | 3.0 |
| KIAA0196     | 12.5 | 5.0 |
| KIDINS220    | 11.7 | 2.0 |
| KIF2C        | 23.8 | 2.0 |
| KLHDC10      | 11.6 | 2.0 |
| LIMD1        | 11.8 | 3.0 |
| M6PR         | 12.3 | 2.0 |
| MALT1        | 22.9 | 2.0 |
| MAPK10;MAPK9 | 22.3 | 2.0 |
| MAPKAP1      | 25.4 | 2.0 |
| MASTL        | 11.5 | 2.0 |
| MED14        | 12.5 | 2.5 |
| MED16        | 12.1 | 2.0 |
| METTL1       | 11.2 | 2.0 |
| MMTAG2       | 11.8 | 3.0 |
| MORC3        | 11.6 | 2.0 |
| MPRIP        | 13.0 | 2.0 |
| MPST         | 12.2 | 2.0 |
| MRPL37       | 24.5 | 2.0 |
| MRPL40       | 11.3 | 2.0 |
| MRPL47       | 12.3 | 3.0 |
| MTMR9        | 11.8 | 3.0 |
| MVD          | 12.3 | 3.0 |
| MYLK         | 25.9 | 2.0 |
| NAF1         | 12.0 | 2.0 |
| NELFCD;TH1L  | 12.3 | 2.0 |
| NFATC2IP     | 11.7 | 2.0 |
| NHLRC2       | 24.1 | 2.0 |
| NMD3         | 12.1 | 3.0 |
| NUF2         | 24.5 | 3.0 |
| NUP205       | 11.9 | 2.0 |
| NUP43        | 11.5 | 2.0 |

---

---

|                 |      |     |
|-----------------|------|-----|
| NUP85           | 12.5 | 2.0 |
| OSBPL11;OSBPL10 | 12.5 | 3.0 |
| PAK4            | 12.3 | 3.0 |
| PCDHGC3         | 12.2 | 2.0 |
| PI4KA           | 12.9 | 2.0 |
| PLEC            | 12.4 | 2.0 |
| POFUT2          | 12.0 | 2.0 |
| POP1            | 12.2 | 2.0 |
| PREPL           | 12.3 | 2.0 |
| PRKCA;PRKCB     | 12.6 | 3.0 |
| PRKRA           | 12.7 | 2.0 |
| PRPS1           | 12.6 | 2.0 |
| PSMF1           | 11.5 | 2.0 |
| PSMG2           | 13.1 | 4.0 |
| PSPH            | 11.6 | 2.0 |
| PTPN9           | 11.8 | 2.0 |
| R3HDM1          | 12.3 | 3.0 |
| RAB35           | 12.3 | 3.0 |
| RAP2B           | 13.0 | 2.0 |
| RAPH1           | 28.1 | 2.0 |
| RBM42           | 12.2 | 2.0 |
| RICTOR          | 2.1  | 3.1 |
| SCD5            | 11.2 | 2.0 |
| SLC25A10        | 12.4 | 2.0 |
| SLC35F6         | 10.5 | 2.0 |
| SLC38A2         | 12.7 | 2.0 |
| SLC7A1          | 11.8 | 2.0 |
| SMCHD1          | 11.9 | 2.0 |
| SMG9            | 12.7 | 3.0 |
| SPATA5          | 23.9 | 2.5 |
| SSH1            | 24.0 | 2.0 |
| STARD13         | 12.4 | 2.0 |
| STUB1           | 12.5 | 2.0 |
| SYDE1           | 23.9 | 2.0 |
| SYNJ1           | 23.8 | 3.3 |
| TACO1           | 12.1 | 2.0 |
| TAP2            | 12.0 | 2.0 |
| TEX10           | 11.1 | 2.0 |
| TMEM205         | 12.4 | 2.0 |
| TRMT10C         | 12.1 | 2.0 |
| TSSC1           | 11.7 | 2.0 |
| TTC7B           | 11.8 | 2.0 |
| UBAP2           | 12.2 | 2.0 |
| USP34           | 10.8 | 2.0 |
| UXS1            | 11.8 | 2.0 |
| VAC14           | 24.4 | 2.0 |
| VPS41           | 12.6 | 2.0 |
| WWP2            | 11.2 | 2.0 |
| XAB2            | 12.0 | 2.0 |
| XRN1            | 11.2 | 2.0 |
| ZNF316          | 11.2 | 2.0 |

---

## References

1. Yan, H.; Zhang, B.; Li, S.; Zhao, Q. A formal model for analyzing drug combination effects and its application in TNF-alpha-induced NFkappaB pathway. *BMC Syst Biol* **2010**, *4*, 50, doi:10.1186/1752-0509-4-50.
